# Supplementary material for: Effect of Copper Sulphate and Cadmium Chloride on Non-Human Primate Sperm Function In Vitro
Source: MDPI journal article supplement (doi:10.3390/ijerph18126200), 2021-06-08
Supplement: s1 [file s1]

# **Supplementary Material: IJERPH - 1197319**

**Table S1: Vervet sperm motility parameters over 75 minutes**

| <b>Time</b>  | <b>Sample size</b> | <b>Total Motility</b> | <b>Progressive Motility</b> | <b>Rapid Spermatozoa</b> | <b>Medium Spermatozoa</b> | <b>Slow Spermatozoa</b> |
|--------------|--------------------|-----------------------|-----------------------------|--------------------------|---------------------------|-------------------------|
| <b>(min)</b> | <b>n</b>           | <b>(%)</b>            | <b>(%)</b>                  | <b>(%)</b>               | <b>(%)</b>                | <b>(%)</b>              |
| 15           | 5                  | 86.14 ± 7.51          | 58.54 ± 21.88               | 54.29 ± 23.85            | 11.86 ± 10.29             | 19.99 ± 14.45           |
| 30           | 5                  | 72.23 ± 18.08         | 40.99 ± 20.18               | 35.94 ± 20.11            | 10.78 ± 7.94              | 25.50 ± 12.99           |
| 45           | 5                  | 68.46 ± 15.91         | 35.54 ± 15.49               | 30.75 ± 14.56            | 10.90 ± 5.31              | 26.81 ± 12.86           |
| 60           | 4                  | 67.87 ± 15.81         | 26.39 ± 16.62               | 21.16 ± 14.85            | 11.80 ± 5.53              | 34.90 ± 14.17           |
| 75           | 4                  | 55.74 ± 23.02         | 24.38 ± 23.65               | 19.60 ± 23.68            | 10.39 ± 7.47              | 25.75 ± 17.67           |

**Table S2: Vervet sperm kinematic parameters over 75 minutes**

| <b>Time</b>  | <b>Sample size</b> | <b>VCL</b>    | <b>VSL</b>    | <b>VAP</b>     | <b>LIN</b>   | <b>STR</b>   | <b>WOB</b>   | <b>ALH</b>  | <b>BCF</b>  |
|--------------|--------------------|---------------|---------------|----------------|--------------|--------------|--------------|-------------|-------------|
| <b>(min)</b> | <b>n</b>           | <b>(µm/s)</b> | <b>(µm/s)</b> | <b>(µm/s)</b>  | <b>(%)</b>   | <b>(%)</b>   | <b>(%)</b>   | <b>(µm)</b> | <b>(Hz)</b> |
| 15           | 5                  | 206.88 ±98.91 | 140.06 ±94.35 | 172.63 ±102.86 | 62.85 ±13.66 | 78.49 ±6.53  | 79.44 ±10.96 | 2.94 ±0.89  | 12.34 ±2.02 |
| 30           | 5                  | 153.70 ±60.02 | 95.63 ±56.56  | 147.87 ±62.28  | 59.69 ±12.14 | 76.10 ±7.49  | 77.88 ±8.73  | 2.86 ±0.76  | 14.08 ±2.62 |
| 45           | 5                  | 132.45 ±39.81 | 78.80 ± 8.54  | 104.25 ±42.43  | 57.92 ±12.25 | 74.60 ±7.93  | 77.10 ±9.41  | 2.66 ±0.67  | 13.60 ±1.80 |
| 60           | 4                  | 114.91 ±42.82 | 64.66 ±46.01  | 86.09 ±47.11   | 52.48 ±19.90 | 70.57 ±15.05 | 72.23 ±13.75 | 2.39 ±0.44  | 11.32 ±2.72 |
| 75           | 4                  | 113.49 ±72.76 | 71.18 ±82.68  | 88.05 ±83.65   | 50.19 ±29.20 | 68.51 ±21.47 | 68.29 ±21.83 | 1.55 ±1.06  | 9.81 ±6.64  |

VCL-curvilinear velocity, VSL- straight-line velocity, VAP –average-path velocity, LIN -linearity, STR –straightness, WOB –wobble, ALH -amplitude of lateral head displacement and BCF –beat-cross frequency.

**Table S3: Vervet sperm motility parameters over 120 minutes of exposure to CuSO<sub>4</sub> (0-250 µg/ml) (n=4)**

| Time (min) | CuSO <sub>4</sub> (µg/ml) | Total Motility (%)         | Progressive Motility (%)   | Rapid Spermatozoa (%)      | Medium Spermatozoa (%)   | Slow Spermatozoa (%) |
|------------|---------------------------|----------------------------|----------------------------|----------------------------|--------------------------|----------------------|
| 15         | 0                         | 46,94 ± 24.54              | 23,22 ± 15,76 <sup>a</sup> | 19,05 ± 14,05 <sup>a</sup> | 10,14 ± 6,99             | 17,73 ± 5,22         |
|            | 10                        | 43,31 ± 20.71              | 21,46 ± 11,58 <sup>a</sup> | 16,97 ± 5,73 <sup>a</sup>  | 6,52 ± 8,82              | 19,82 ± 7,20         |
|            | 50                        | 42,65 ± 27.44              | 25,35 ± 25,95 <sup>a</sup> | 20,06 ± 17,40 <sup>a</sup> | 7,76 ± 10,38             | 14,83 ± 4,46         |
|            | 100                       | 32,89 ± 17.93              | 14,90 ± 9,16 <sup>a</sup>  | 12,07 ± 6,83 <sup>a</sup>  | 6,38 ± 3,84              | 14,45 ± 8,55         |
|            | 250                       | 7,31 ± 7.42                | 0,63 ± 0,76 <sup>b</sup>   | 0,48 ± 0,56 <sup>b</sup>   | 0,48 ± 0,97              | 6,35 ± 6,44          |
| 60         | 0                         | 40,82 ± 20.73 <sup>a</sup> | 11,56 ± 7,24 <sup>a</sup>  | 9,15 ± 6,35 <sup>a</sup>   | 5,39 ± 3,75 <sup>a</sup> | 26,29 ± 11,29        |
|            | 10                        | 37,64 ± 12.72 <sup>a</sup> | 15,50 ± 3,94 <sup>a</sup>  | 11,66 ± 5,07 <sup>ab</sup> | 5,89 ± 2,29 <sup>a</sup> | 20,10 ± 12,20        |
|            | 50                        | 31,72 ± 9.67 <sup>a</sup>  | 9,38 ± 6,91 <sup>ab</sup>  | 7,80 ± 6,78 <sup>ac</sup>  | 3,87 ± 0,42 <sup>a</sup> | 20,05 ± 13,41        |
|            | 100                       | 14,55 ± 9.82 <sup>b</sup>  | 3,71 ± 3,27 <sup>c</sup>   | 2,58 ± 2,35 <sup>d</sup>   | 3,51 ± 2,89 <sup>a</sup> | 8,46 ± 6,77          |
|            | 250                       | 0,38 ± 0.77 <sup>b</sup>   | 0,00 ± 0,00 <sup>cd</sup>  | 0,00 ± 0,00 <sup>de</sup>  | 0,00 ± 0,00 <sup>b</sup> | 0,38 ± 0,77          |
| 120        | 0                         | 24,76 ± 12.96              | 5,88 ± 4,15 <sup>a</sup>   | 5,05 ± 3,57 <sup>a</sup>   | 1,22 ± 1,07              | 18,49 ± 9,49         |
|            | 10                        | 28,45 ± 11.66              | 7,80 ± 2,14 <sup>ab</sup>  | 5,85 ± 0,59 <sup>a</sup>   | 3,33 ± 1,48              | 19,27 ± 10,15        |
|            | 50                        | 15,82 ± 5.72               | 3,86 ± 2,77 <sup>ac</sup>  | 2,32 ± 1,56 <sup>ab</sup>  | 2,79 ± 2,39              | 10,71 ± 3,00         |
|            | 100                       | 3,70 ± 7.41                | 0,31 ± 0,62 <sup>d</sup>   | 0,21 ± 0,41 <sup>c</sup>   | 0,21 ± 0,41              | 3,29 ± 6,58          |
|            | 250                       | 0,00 ± 0.00                | 0,00 ± 0,00 <sup>d</sup>   | 0,00 ± 0,00 <sup>c</sup>   | 0,00 ± 0,00              | 0,00 ± 0,00          |

CuSO<sub>4</sub>-copper sulphate, a-e = values in columns with different superscript letters were significantly different among the concentrations of CuSO<sub>4</sub> (P < 0.05).

**Table S4: Vervet sperm kinematic parameters over 120 minutes of exposure to CuSO<sub>4</sub> (0-250 µg/ml) (n=4)**

| Time (min) | CuSO <sub>4</sub> (µg/ml) | VCL (µm/s)     | VSL (µm/s)    | VAP (µm/s)    | LIN (%)       | STR (%)                     | WOB (%)                    | ALH (µm)                 | BCF (Hz)                  |
|------------|---------------------------|----------------|---------------|---------------|---------------|-----------------------------|----------------------------|--------------------------|---------------------------|
| 15         | 0                         | 118,89 ± 37,94 | 56,71 ± 21,27 | 70,68 ± 24,37 | 47,22 ± 3,17  | 79,89 ± 3,76 <sup>a</sup>   | 59,08 ± 1,79 <sup>a</sup>  | 2,49 ± 1,02              | 17,00 ± 5,06              |
|            | 10                        | 125,18 ± 21,19 | 71,50 ± 13,60 | 81,68 ± 14,28 | 57,34 ± 6,68  | 87,42 ± 2,62 <sup>b</sup>   | 65,47 ± 5,87 <sup>a</sup>  | 3,08 ± 0,41              | 20,35 ± 4,46              |
|            | 50                        | 121,29 ± 20,47 | 60,52 ± 12,88 | 74,03 ± 15,50 | 49,95 ± 7,95  | 81,70 ± 1,78 <sup>ac</sup>  | 61,03 ± 8,50 <sup>a</sup>  | 2,49 ± 0,56              | 20,81 ± 4,25              |
|            | 100                       | 94,94 ± 21,11  | 50,97 ± 22,48 | 61,58 ± 23,23 | 51,44 ± 15,54 | 80,40 ± 8,39 <sup>abc</sup> | 62,95 ± 13,63 <sup>a</sup> | 1,86 ± 0,62              | 18,78 ± 8,50              |
|            | 250                       | 31,72 ± 30,58  | 8,97 ± 9,26   | 14,24 ± 13,72 | 19,89 ± 14,30 | 44,00 ± 30,97 <sup>d</sup>  | 33,76 ± 22,60 <sup>b</sup> | 0,55 ± 0,93              | 4,52 ± 6,84               |
| 60         | 0                         | 81,47 ± 14,41  | 36,76 ± 10,90 | 46,53 ± 11,22 | 44,76 ± 8,56  | 78,34 ± 5,27 <sup>a</sup>   | 56,80 ± 6,82 <sup>a</sup>  | 1,83 ± 0,76 <sup>a</sup> | 14,17 ± 3,63 <sup>a</sup> |
|            | 10                        | 100,64 ± 23,25 | 56,27 ± 28,95 | 67,86 ± 29,08 | 53,91 ± 16,41 | 80,77 ± 7,69 <sup>ab</sup>  | 65,73 ± 14,35 <sup>a</sup> | 2,02 ± 0,43 <sup>a</sup> | 14,81 ± 3,16 <sup>a</sup> |
|            | 50                        | 87,05 ± 34,19  | 44,33 ± 22,36 | 55,68 ± 23,81 | 49,08 ± 6,80  | 77,26 ± 9,47 <sup>ac</sup>  | 63,48 ± 2,61 <sup>a</sup>  | 1,52 ± 0,82 <sup>a</sup> | 13,87 ± 5,94 <sup>a</sup> |
|            | 100                       | 56,86 ± 39,73  | 20,51 ± 14,37 | 27,97 ± 19,31 | 27,10 ± 18,25 | 54,81 ± 36,66 <sup>d</sup>  | 37,06 ± 24,79 <sup>b</sup> | 1,53 ± 1,16 <sup>a</sup> | 13,44 ± 9,85 <sup>a</sup> |
|            | 250                       | 3,46 ± 6,92    | 0,07 ± 0,15   | 0,22 ± 0,44   | 0,53 ± 1,06   | 8,33 ± 16,67 <sup>e</sup>   | 1,59 ± 3,19 <sup>b</sup>   | 0,00 ± 0,00 <sup>b</sup> | 0,00 ± 0,00 <sup>b</sup>  |

|     |     |               |               |               |                            |                            |               |             |                           |
|-----|-----|---------------|---------------|---------------|----------------------------|----------------------------|---------------|-------------|---------------------------|
|     | 0   | 71,96 ± 11,96 | 37,56 ± 16,56 | 46,64 ± 14,57 | 51,03 ± 18,24 <sup>a</sup> | 78,13 ± 10,56 <sup>a</sup> | 63,98 ± 13,62 | 1,68 ± 0,91 | 15,67 ± 4,42 <sup>a</sup> |
|     | 10  | 80,94 ± 6,45  | 42,58 ± 8,53  | 52,28 ± 4,51  | 53,12 ± 12,69 <sup>a</sup> | 81,03 ± 12,57 <sup>a</sup> | 64,86 ± 6,96  | 1,47 ± 0,70 | 14,40 ± 3,62 <sup>a</sup> |
| 120 | 50  | 61,57 ± 28,75 | 25,20 ± 20,39 | 34,69 ± 22,57 | 34,91 ± 20,07 <sup>a</sup> | 64,43 ± 20,79 <sup>a</sup> | 50,56 ± 17,00 | 1,21 ± 1,06 | 10,79 ± 8,26 <sup>a</sup> |
|     | 100 | 12,59 ± 25,18 | 2,06 ± 4,12   | 4,14 ± 8,28   | 4,10 ± 8,19 <sup>b</sup>   | 12,46 ± 24,91 <sup>b</sup> | 8,22 ± 16,44  | 0,13 ± 0,26 | 1,40 ± 2,80 <sup>b</sup>  |
|     | 250 | 0,00 ± 0,00   | 0,00 ± 0,00   | 0,00 ± 0,00   | 0,00 ± 0,00 <sup>b</sup>   | 0,00 ± 0,00 <sup>b</sup>   | 0,00 ± 0,00   | 0,00 ± 0,00 | 0,00 ± 0,00 <sup>b</sup>  |

CuSO<sub>4</sub>-copper sulphate, VCL-curvilinear velocity, VSL-straight-line velocity, VAP-average-path velocity, LIN-linearity, STR-straightness, WOB-wobble, ALH-amplitude of lateral head displacement and BCF-beat-cross frequency, a-e = values in columns with different superscript letters were significantly different among the concentrations of CuSO<sub>4</sub> (P < 0.05).

**Table S5: Vervet sperm motility parameters over 120 minutes of exposure to CdCl<sub>2</sub> (0-500 µg/ml) (n=4)**

| Time (min) | CdCl <sub>2</sub> (µg/ml) | Total Motility (%)         | Progressive Motility (%)   | Rapid Spermatozoa (%)      | Medium Spermatozoa (%)   | Slow Spermatozoa (%)       |
|------------|---------------------------|----------------------------|----------------------------|----------------------------|--------------------------|----------------------------|
|            | 0                         | 45,70 ± 35,36              | 26,76 ± 31,64              | 23,19 ± 31,14              | 6,29 ± 3,53              | 16,22 ± 3,61               |
|            | 10                        | 42,61 ± 36,69              | 23,87 ± 32,81              | 21,76 ± 32,30              | 3,92 ± 2,31              | 16,94 ± 5,89               |
| 15         | 50                        | 41,35 ± 33,80              | 19,59 ± 31,35              | 17,56 ± 30,32              | 4,34 ± 3,22              | 19,45 ± 3,35               |
|            | 100                       | 29,57 ± 43,88              | 17,76 ± 34,09              | 16,62 ± 32,27              | 3,50 ± 5,86              | 9,46 ± 6,66                |
|            | 500                       | 1,21 ± 2,41                | 0,00 ± 0,00                | 0,00 ± 0,00                | 0,00 ± 0,00              | 1,21 ± 2,41                |
|            | 0                         | 39,72 ± 40,6               | 23,75 ± 31,15 <sup>a</sup> | 21,52 ± 30,21 <sup>a</sup> | 3,68 ± 3,15              | 14,52 ± 8,74 <sup>a</sup>  |
|            | 10                        | 39,76 ± 35,3               | 19,13 ± 29,22 <sup>a</sup> | 16,96 ± 27,39 <sup>a</sup> | 4,36 ± 4,07              | 18,44 ± 5,77 <sup>a</sup>  |
| 60         | 50                        | 21,99 ± 33,6               | 8,22 ± 15,52 <sup>a</sup>  | 7,10 ± 13,62 <sup>a</sup>  | 2,30 ± 3,27              | 12,58 ± 16,94 <sup>a</sup> |
|            | 100                       | 14,74 ± 28,60              | 3,04 ± 6,07 <sup>b</sup>   | 2,09 ± 4,18 <sup>b</sup>   | 1,94 ± 3,65              | 10,71 ± 20,73 <sup>b</sup> |
|            | 500                       | 0,00 ± 0,00                | 0,00 ± 0,00 <sup>c</sup>   | 0,00 ± 0,00 <sup>c</sup>   | 0,00 ± 0,00              | 0,00 ± 0,00 <sup>c</sup>   |
|            | 0                         | 32,82 ± 44,20 <sup>a</sup> | 16,50 ± 27,81 <sup>a</sup> | 14,78 ± 26,39 <sup>a</sup> | 5,93 ± 7,59 <sup>a</sup> | 12,11 ± 11,80              |
|            | 10                        | 26,71 ± 34,90 <sup>a</sup> | 11,36 ± 21,63 <sup>a</sup> | 9,55 ± 18,41 <sup>a</sup>  | 3,24 ± 6,10 <sup>a</sup> | 13,91 ± 10,73              |
| 120        | 50                        | 10,40 ± 13,50 <sup>a</sup> | 0,36 ± 0,42 <sup>b</sup>   | 0,10 ± 0,12 <sup>b</sup>   | 0,82 ± 1,01 <sup>b</sup> | 9,48 ± 12,79               |
|            | 100                       | 6,82 ± 13,60 <sup>a</sup>  | 0,28 ± 0,56 <sup>b</sup>   | 0,14 ± 0,28 <sup>b</sup>   | 0,97 ± 1,95 <sup>b</sup> | 5,71 ± 11,41               |
|            | 500                       | 0,00 ± 0,00 <sup>b</sup>   | 0,00 ± 0,00 <sup>b</sup>   | 0,00 ± 0,00 <sup>b</sup>   | 0,00 ± 0,00 <sup>b</sup> | 0,00 ± 0,00                |

CdCl<sub>2</sub>-cadmium chloride, a-c = values in columns with different superscript letters were significantly different among the concentrations of CdCl<sub>2</sub> (P<0.05).

**Table S6: Vervet sperm kinematic parameters over 120 minutes of exposure to CdCl<sub>2</sub> (0-500 µg/ml) (n=4)**

| Time (min) | CdCl <sub>2</sub> (µg/ml) | VCL (µm/s)     | VSL (µm/s)                 | VAP (µm/s)                 | LIN (%)                    | STR (%)                    | WOB (%)                    | ALH (µm)                 | BCF (Hz)                  |
|------------|---------------------------|----------------|----------------------------|----------------------------|----------------------------|----------------------------|----------------------------|--------------------------|---------------------------|
| 15         | 0                         | 112,17 ± 56,84 | 63,95 ± 39,75              | 79,09 ± 50,72              | 54,27 ± 12,39              | 80,08 ± 9,92               | 67,34 ± 10,84              | 2,49 ± 0,54 <sup>a</sup> | 15,66 ± 3,30 <sup>a</sup> |
|            | 10                        | 105,76 ± 59,64 | 59,17 ± 32,56              | 74,14 ± 45,72              | 57,16 ± 15,32              | 81,40 ± 7,29               | 69,65 ± 13,29              | 2,26 ± 1,14 <sup>a</sup> | 14,52 ± 4,07 <sup>a</sup> |
|            | 50                        | 93,44 ± 50,15  | 52,32 ± 31,98              | 66,41 ± 42,45              | 54,73 ± 11,88              | 79,17 ± 6,65               | 68,73 ± 10,48              | 2,38 ± 0,65 <sup>a</sup> | 15,27 ± 1,85 <sup>a</sup> |
|            | 100                       | 78,99 ± 67,74  | 37,21 ± 44,13              | 50,32 ± 56,24              | 37,00 ± 19,96              | 65,67 ± 15,35              | 52,62 ± 21,95              | 1,33 ± 1,36 <sup>b</sup> | 7,81 ± 7,01 <sup>b</sup>  |
|            | 500                       | 9,20 ± 18,40   | 2,86 ± 5,72                | 5,35 ± 10,70               | 7,77 ± 15,54               | 13,36 ± 26,71              | 14,54 ± 29,08              | 0,00 ± 0,00 <sup>c</sup> | 0,00 ± 0,00 <sup>c</sup>  |
| 60         | 0                         | 103,95 ± 50,99 | 59,55 ± 38,91              | 73,53 ± 47,69              | 52,24 ± 25,09 <sup>a</sup> | 75,36 ± 20,41 <sup>a</sup> | 65,38 ± 21,72 <sup>a</sup> | 1,80 ± 0,99 <sup>a</sup> | 10,70 ± 8,50 <sup>a</sup> |
|            | 10                        | 91,84 ± 48,55  | 52,76 ± 36,26              | 64,52 ± 45,21              | 54,96 ± 12,87 <sup>a</sup> | 82,07 ± 4,13 <sup>a</sup>  | 66,75 ± 14,55 <sup>a</sup> | 1,84 ± 0,75 <sup>a</sup> | 13,54 ± 3,94 <sup>a</sup> |
|            | 50                        | 52,15 ± 43,61  | 28,23 ± 32,77              | 39,62 ± 36,04              | 35,66 ± 30,47 <sup>a</sup> | 48,20 ± 40,07 <sup>a</sup> | 55,59 ± 37,84 <sup>a</sup> | 0,94 ± 1,10 <sup>a</sup> | 6,90 ± 7,96 <sup>a</sup>  |
|            | 100                       | 32,42 ± 37,57  | 15,38 ± 18,01              | 20,49 ± 23,90              | 23,64 ± 27,39 <sup>b</sup> | 37,47 ± 43,28 <sup>b</sup> | 31,52 ± 36,46 <sup>b</sup> | 0,46 ± 0,93 <sup>b</sup> | 3,17 ± 6,35 <sup>b</sup>  |
|            | 500                       | 0,00 ± 0,00    | 0,00 ± 0,00                | 0,00 ± 0,00                | 0,00 ± 0,00 <sup>c</sup>   | 0,00 ± 0,00 <sup>c</sup>   | 0,00 ± 0,00 <sup>c</sup>   | 0,00 ± 0,00 <sup>c</sup> | 0,00 ± 0,00 <sup>c</sup>  |
| 120        | 0                         | 81,28 ± 63,87  | 46,71 ± 38,26 <sup>a</sup> | 56,68 ± 46,95 <sup>a</sup> | 43,44 ± 34,13              | 62,17 ± 42,36 <sup>a</sup> | 51,60 ± 37,58              | 1,92 ± 1,49 <sup>a</sup> | 13,42 ± 9,59 <sup>a</sup> |
|            | 10                        | 63,77 ± 43,87  | 28,76 ± 34,87 <sup>a</sup> | 38,07 ± 42,15 <sup>a</sup> | 35,68 ± 19,15              | 69,70 ± 10,96 <sup>a</sup> | 49,49 ± 20,47              | 0,98 ± 0,94 <sup>a</sup> | 8,39 ± 5,59 <sup>a</sup>  |
|            | 50                        | 25,21 ± 29,28  | 6,67 ± 7,81 <sup>b</sup>   | 11,69 ± 13,52 <sup>a</sup> | 13,17 ± 15,24              | 28,41 ± 33,04 <sup>b</sup> | 23,26 ± 26,90              | 1,28 ± 1,49 <sup>a</sup> | 3,92 ± 5,43 <sup>b</sup>  |
|            | 100                       | 13,47 ± 26,94  | 3,22 ± 6,43 <sup>c</sup>   | 6,61 ± 13,23 <sup>b</sup>  | 5,97 ± 11,94               | 12,16 ± 24,32 <sup>c</sup> | 12,27 ± 24,55              | 0,81 ± 1,63 <sup>b</sup> | 0,99 ± 1,99 <sup>c</sup>  |
|            | 500                       | 0,00 ± 0,00    | 0,00 ± 0,00 <sup>c</sup>   | 0,00 ± 0,00 <sup>b</sup>   | 0,00 ± 0,00                | 0,00 ± 0,00 <sup>c</sup>   | 0,00 ± 0,00                | 0,00 ± 0,00 <sup>c</sup> | 0,00 ± 0,00 <sup>c</sup>  |

CdCl<sub>2</sub>-cadmium chloride, VCL-curvilinear velocity, VSL-straight-line velocity, VAP-average-path velocity, LIN-linearity, STR-straightness, WOB-wobble, ALH-amplitude of lateral head displacement and BCF-beat-cross frequency, a-c = values in columns with different superscript letters were significantly different among the concentrations of CdCl<sub>2</sub> (P<0.05).

**Table S7: Baboon sperm motility parameters over 75 minutes of exposure to CuSO<sub>4</sub> (0-250 µg/ml) (n=4)**

| <b>Time<br/>(mins)</b> | <b>CuSO<sub>4</sub><br/>(µg/ml)</b> | <b>Total<br/>Motility<br/>(%)</b> | <b>Progressive<br/>Motility<br/>(%)</b> | <b>Rapid<br/>Spermatozoa<br/>(%)</b> | <b>Medium<br/>Spermatozoa<br/>(%)</b> | <b>Slow<br/>Spermatozoa<br/>(%)</b> |
|------------------------|-------------------------------------|-----------------------------------|-----------------------------------------|--------------------------------------|---------------------------------------|-------------------------------------|
| 15                     | 0                                   | 61.95 ± 13.14                     | 35.98 ± 9.16                            | 0.83 ± 0.86                          | 13.38 ± 5.90                          | 33.54 ± 9.33                        |
|                        | 10                                  | 60.37 ± 18.75                     | 29.34 ± 9.64                            | 1.78 ± 2.51                          | 11.22 ± 5.84                          | 29.96 ± 7.52                        |
|                        | 50                                  | 50.53 ± 32.91                     | 22.68 ± 16.22                           | 1.49 ± 2.79                          | 8.29 ± 8.17                           | 25.57 ± 18.01                       |
|                        | 100                                 | 62.68 ± 17.21                     | 29.74 ± 13.62                           | 1.95 ± 2.69                          | 11.20 ± 9.41                          | 31.50 ± 4.97                        |
|                        | 250                                 | 54.94 ± 14.92                     | 26.63 ± 9.97                            | 1.29 ± 1.77                          | 9.00 ± 5.60                           | 28.99 ± 9.12                        |
| 45                     | 0                                   | 50.72 ± 12.50                     | 16.39 ± 7.86                            | 0.11 ± 0.22                          | 3.45 ± 4.01                           | 25.93 ± 3.52                        |
|                        | 10                                  | 45.02 ± 26.63                     | 13.04 ± 13.83                           | 0.82 ± 1.63                          | 3.96 ± 6.15                           | 17.91 ± 10.21                       |
|                        | 50                                  | 37.94 ± 29.16                     | 10.08 ± 11.18                           | 0.31 ± 0.62                          | 2.01 ± 4.01                           | 17.45 ± 12.93                       |
|                        | 100                                 | 50.71 ± 15.48                     | 14.38 ± 16.25                           | 0.97 ± 1.94                          | 3.64 ± 6.29                           | 22.39 ± 7.39                        |
|                        | 250                                 | 25.43 ± 20.85                     | 9.45 ± 10.81                            | 0.43 ± 0.87                          | 2.91 ± 4.59                           | 11.63 ± 11.02                       |
| 75                     | 0                                   | 54.52 ± 13.89                     | 15.09 ± 13.46                           | 0.09 ± 0.16 <sup>a</sup>             | 3.25 ± 4.78                           | 24.72 ± 11.62                       |
|                        | 10                                  | 44.03 ± 27.94                     | 12.92 ± 16.27                           | 1.01 ± 1.76 <sup>a</sup>             | 3.85 ± 5.80                           | 17.61 ± 11.45                       |
|                        | 50                                  | 34.16 ± 29.16                     | 9.86 ± 13.31                            | 0.15 ± 0.26 <sup>a</sup>             | 2.74 ± 4.75                           | 13.98 ± 12.91                       |
|                        | 100                                 | 47.06 ± 9.28                      | 12.20 ± 12.46                           | 0.65 ± 1.13 <sup>a</sup>             | 3.50 ± 5.59                           | 18.44 ± 8.57                        |
|                        | 250                                 | 16.83 ± 15.58                     | 4.37 ± 3.79                             | 0.00 ± 0.00 <sup>b</sup>             | 0.72 ± 0.64                           | 8.20 ± 7.63                         |

CuSO<sub>4</sub>-copper sulphate, a ,b = values in columns with different superscript letters were significantly different among the concentrations of CuSO<sub>4</sub> (P < 0.05).

**Table S8: Baboon sperm kinematic parameters over 75 minutes of exposure to CuSO<sub>4</sub> (0-250 µg/ml) (n=4)**

| Time (min) | CuSO <sub>4</sub> (µg/ml) | VCL (µm/s)     | VSL (µm/s)    | VAP (µm/s)     | LIN (%)                     | STR (%)                     | WOB (%)                     | ALH (µm)    | BCF (Hz)                   |
|------------|---------------------------|----------------|---------------|----------------|-----------------------------|-----------------------------|-----------------------------|-------------|----------------------------|
| 15         | 0                         | 116.56 ± 18.75 | 88.07 ± 18.44 | 101.54 ± 21.38 | 75.21 ± 5.08 <sup>a</sup>   | 86.78 ± 1.23 <sup>a</sup>   | 86.68 ± 5.85                | 1.81 ± 0.15 | 15.42 ± 0.82 <sup>a</sup>  |
|            | 10                        | 110.46 ± 17.69 | 70.68 ± 21.12 | 83.40 ± 22.65  | 64.18 ± 16.23 <sup>a</sup>  | 84.21 ± 4.10 <sup>a</sup>   | 75.64 ± 16.15               | 2.26 ± 0.68 | 15.95 ± 3.45 <sup>a</sup>  |
|            | 50                        | 94.30 ± 35.28  | 59.82 ± 38.34 | 73.53 ± 42.22  | 57.35 ± 28.41 <sup>b</sup>  | 74.02 ± 19.82 <sup>b</sup>  | 72.33 ± 25.89               | 1.42 ± 0.99 | 11.20 ± 7.60 <sup>b</sup>  |
|            | 100                       | 106.22 ± 31.29 | 76.17 ± 26.41 | 90.14 ± 30.18  | 70.96 ± 4.43 <sup>ab</sup>  | 84.33 ± 1.57 <sup>ab</sup>  | 84.14 ± 5.16                | 1.86 ± 0.24 | 14.35 ± 0.72 <sup>ab</sup> |
|            | 250                       | 106.36 ± 15.57 | 75.78 ± 17.84 | 89.13 ± 18.40  | 70.59 ± 9.22 <sup>ab</sup>  | 84.54 ± 4.69 <sup>ab</sup>  | 83.26 ± 7.26                | 1.82 ± 0.30 | 14.16 ± 0.49 <sup>ab</sup> |
| 45         | 0                         | 80.56 ± 16.30  | 53.76 ± 10.81 | 63.03 ± 13.48  | 66.98 ± 6.05                | 85.51 ± 2.74 <sup>a</sup>   | 78.25 ± 5.13                | 1.74 ± 0.24 | 15.98 ± 1.57               |
|            | 10                        | 79.68 ± 31.92  | 46.14 ± 32.86 | 55.90 ± 35.20  | 54.83 ± 22.53               | 78.78 ± 12.12 <sup>a</sup>  | 67.30 ± 20.14               | 1.69 ± 0.60 | 14.73 ± 5.28               |
|            | 50                        | 63.98 ± 35.76  | 39.99 ± 33.59 | 46.86 ± 35.77  | 52.80 ± 25.14               | 78.38 ± 13.57 <sup>a</sup>  | 64.35 ± 23.46               | 1.09 ± 0.82 | 9.92 ± 7.41                |
|            | 100                       | 77.05 ± 30.98  | 49.01 ± 28.54 | 57.91 ± 30.69  | 60.84 ± 9.60                | 83.20 ± 4.27 <sup>a</sup>   | 72.85 ± 7.86                | 1.48 ± 0.59 | 13.72 ± 4.01               |
|            | 250                       | 60.84 ± 46.61  | 42.00 ± 32.34 | 48.30 ± 37.49  | 51.85 ± 34.69               | 65.41 ± 43.61 <sup>b</sup>  | 59.45 ± 39.76               | 1.18 ± 0.90 | 11.37 ± 7.95               |
| 75         | 0                         | 74.75 ± 22.90  | 47.60 ± 16.07 | 56.43 ± 20.17  | 63.36 ± 2.70 <sup>a</sup>   | 84.76 ± 1.70 <sup>a</sup>   | 74.80 ± 4.36 <sup>a</sup>   | 1.68 ± 0.19 | 16.86 ± 1.22 <sup>a</sup>  |
|            | 10                        | 81.58 ± 34.20  | 46.41 ± 37.15 | 56.01 ± 40.70  | 52.69 ± 25.06 <sup>a</sup>  | 78.96 ± 11.94 <sup>a</sup>  | 64.39 ± 24.04 <sup>a</sup>  | 1.86 ± 0.32 | 17.78 ± 6.20 <sup>a</sup>  |
|            | 50                        | 53.64 ± 53.20  | 35.14 ± 36.71 | 41.04 ± 42.75  | 42.60 ± 37.23 <sup>b</sup>  | 56.98 ± 49.35 <sup>b</sup>  | 49.83 ± 43.50 <sup>b</sup>  | 1.10 ± 1.01 | 10.20 ± 8.93 <sup>b</sup>  |
|            | 100                       | 77.73 ± 33.12  | 48.40 ± 28.03 | 58.19 ± 33.65  | 59.38 ± 11.37 <sup>ab</sup> | 83.07 ± 0.72 <sup>ab</sup>  | 71.42 ± 13.31 <sup>ab</sup> | 1.55 ± 0.53 | 12.23 ± 3.88 <sup>c</sup>  |
|            | 250                       | 50.25 ± 43.76  | 33.54 ± 29.87 | 38.79 ± 34.22  | 44.28 ± 38.70 <sup>bc</sup> | 57.47 ± 49.82 <sup>bc</sup> | 51.29 ± 44.60 <sup>bc</sup> | 1.14 ± 0.99 | 11.34 ± 9.82 <sup>c</sup>  |

CuSO<sub>4</sub>-copper sulphate, VCL-curvilinear velocity, VSL- straight-line velocity, VAP-average-path velocity, LIN-linearity, STR-straightness, WOB-wobble, ALH-amplitude of lateral head displacement and BCF-beat-cross frequency, a-c = values in columns with different superscript letters were significantly different among the concentrations of CuSO<sub>4</sub> (P < 0.05).

**Table S9: Baboon sperm motility parameters over 75 minutes of exposure to CdCl<sub>2</sub> (0-500 µg/ml) (n=4)**

| Time (min) | CdCl <sub>2</sub> (µg/ml) | Total Motility (%) | Progressive Motility (%) | Rapid Spermatozoa (%)    | Medium Spermatozoa (%) | Slow Spermatozoa (%) |
|------------|---------------------------|--------------------|--------------------------|--------------------------|------------------------|----------------------|
| 15         | 0                         | 66.88 ± 34.88      | 46.11 ± 30.47            | 1.07 ± 1.96              | 18.26 ± 16.32          | 40.22 ± 19.00        |
|            | 10                        | 74.02 ± 36.83      | 51.66 ± 30.14            | 5.11 ± 6.35              | 25.33 ± 16.46          | 32.48 ± 21.58        |
|            | 50                        | 65.08 ± 43.81      | 47.70 ± 27.56            | 4.86 ± 7.91              | 19.22 ± 13.37          | 34.61 ± 20.48        |
|            | 100                       | 69.55 ± 36.04      | 45.30 ± 30.93            | 6.35 ± 8.94              | 16.96 ± 15.38          | 34.34 ± 22.64        |
|            | 500                       | 52.26 ± 39.17      | 24.80 ± 23.57            | 0.83 ± 0.95              | 10.05 ± 11.65          | 25.58 ± 21.73        |
| 45         | 0                         | 57.10 ± 34.14      | 26.15 ± 19.33            | 0.15 ± 0.18 <sup>a</sup> | 7.17 ± 6.25            | 34.10 ± 22.53        |
|            | 10                        | 64.53 ± 29.44      | 36.79 ± 22.74            | 2.14 ± 1.74 <sup>b</sup> | 8.76 ± 11.72           | 42.01 ± 23.46        |
|            | 50                        | 61.95 ± 33.13      | 35.87 ± 20.84            | 2.44 ± 2.82 <sup>c</sup> | 11.67 ± 10.07          | 36.40 ± 24.07        |

|    |     |                            |               |                           |                           |                            |
|----|-----|----------------------------|---------------|---------------------------|---------------------------|----------------------------|
|    | 100 | 61.78 ± 27.10              | 31.84 ± 19.66 | 2.19 ± 2.45 <sup>c</sup>  | 11.38 ± 12.74             | 30.93 ± 18.77              |
|    | 500 | 0.90 ± 1.08                | 0.00 ± 0.00   | 0.00 ± 0.00 <sup>d</sup>  | 0.00 ± 0.00               | 0.09 ± 0.18                |
|    | 0   | 73.21 ± 16.45 <sup>a</sup> | 32.19 ± 13.78 | 0.00 ± 0.00 <sup>a</sup>  | 6.68 ± 5.40 <sup>a</sup>  | 49.02 ± 16.60 <sup>a</sup> |
|    | 10  | 79.20 ± 7.32 <sup>a</sup>  | 34.09 ± 11.53 | 1.13 ± 1.67 <sup>b</sup>  | 6.56 ± 6.48 <sup>a</sup>  | 48.40 ± 8.93 <sup>a</sup>  |
| 75 | 50  | 73.58 ± 7.40 <sup>a</sup>  | 29.06 ± 21.53 | 1.84 ± 2.72 <sup>b</sup>  | 8.40 ± 10.91 <sup>b</sup> | 38.03 ± 6.85 <sup>a</sup>  |
|    | 100 | 67.76 ± 8.30 <sup>a</sup>  | 22.74 ± 13.87 | 0.00 ± 0.00 <sup>ac</sup> | 6.89 ± 8.04 <sup>ab</sup> | 33.39 ± 8.93 <sup>a</sup>  |
|    | 500 | 0.00 ± 0.00 <sup>b</sup>   | 0.00 ± 0.00   | 0.00 ± 0.00 <sup>ac</sup> | 0.00 ± 0.00 <sup>c</sup>  | 0.00 ± 0.00 <sup>b</sup>   |

CdCl<sub>2</sub>-cadmium chloride, a–c = values in columns with different superscript letters were significantly different among the concentrations of CdCl<sub>2</sub> (P<0.05).

**Table S10: Baboon sperm kinematic parameters over 75 minutes of exposure to CdCl<sub>2</sub> (0-500 µg/ml) (n=4)**

| Time (min) | CdCl <sub>2</sub> (µg/ml) | VCL (µm/s)                 | VSL (µm/s)                 | VAP (µm/s)                 | LIN (%)                    | STR (%)                    | WOB (%)                    | ALH (µm)    | BCF (Hz)     |
|------------|---------------------------|----------------------------|----------------------------|----------------------------|----------------------------|----------------------------|----------------------------|-------------|--------------|
|            | 0                         | 125.47 ± 22.64             | 91.47 ± 15.29              | 108.71 ± 22.11             | 73.11 ± 3.89 <sup>a</sup>  | 84.60 ± 4.13 <sup>a</sup>  | 86.43 ± 2.59 <sup>a</sup>  | 2.01 ± 0.38 | 16.48 ± 2.92 |
|            | 10                        | 155.71 ± 34.36             | 95.45 ± 28.29              | 138.03 ± 36.94             | 62.04 ± 14.06 <sup>b</sup> | 71.26 ± 18.53 <sup>a</sup> | 87.97 ± 5.61 <sup>a</sup>  | 1.87 ± 1.08 | 11.78 ± 4.90 |
| 15         | 50                        | 137.41 ± 36.18             | 105.28 ± 29.69             | 121.27 ± 35.81             | 76.36 ± 6.28 <sup>c</sup>  | 87.02 ± 4.16 <sup>a</sup>  | 87.69 ± 4.10 <sup>a</sup>  | 1.81 ± 0.58 | 12.70 ± 3.79 |
|            | 100                       | 145.31 ± 45.38             | 113.72 ± 44.78             | 129.72 ± 48.40             | 76.77 ± 9.57 <sup>ab</sup> | 87.11 ± 5.53 <sup>a</sup>  | 87.93 ± 6.34 <sup>a</sup>  | 1.85 ± 0.30 | 15.64 ± 3.02 |
|            | 500                       | 76.33 ± 53.98              | 50.87 ± 35.89              | 60.84 ± 44.04              | 50.01 ± 33.39 <sup>d</sup> | 63.23 ± 42.29 <sup>b</sup> | 59.40 ± 39.72 <sup>b</sup> | 1.42 ± 0.97 | 11.69 ± 7.88 |
|            | 0                         | 101.48 ± 19.37             | 71.66 ± 21.87 <sup>a</sup> | 85.58 ± 22.93              | 69.49 ± 8.87               | 83.15 ± 4.23 <sup>a</sup>  | 83.38 ± 7.10 <sup>a</sup>  | 1.82 ± 0.55 | 12.64 ± 3.71 |
|            | 10                        | 113.92 ± 28.02             | 81.13 ± 24.60 <sup>a</sup> | 94.82 ± 29.41              | 70.50 ± 4.06               | 85.64 ± 1.70 <sup>a</sup>  | 82.34 ± 5.02 <sup>a</sup>  | 1.79 ± 0.29 | 15.17 ± 1.48 |
| 45         | 50                        | 124.39 ± 29.22             | 98.39 ± 31.25 <sup>a</sup> | 111.94 ± 33.59             | 77.93 ± 7.53               | 87.52 ± 1.93 <sup>a</sup>  | 88.94 ± 6.68 <sup>a</sup>  | 1.79 ± 0.25 | 13.95 ± 1.86 |
|            | 100                       | 112.21 ± 29.68             | 85.12 ± 32.26 <sup>a</sup> | 96.12 ± 33.22              | 74.14 ± 9.76               | 87.72 ± 4.43 <sup>a</sup>  | 84.32 ± 7.75 <sup>a</sup>  | 1.86 ± 0.31 | 15.22 ± 2.05 |
|            | 500                       | 22.59 ± 26.34              | 6.15 ± 8.19 <sup>b</sup>   | 9.05 ± 11.26               | 14.29 ± 20.01              | 32.70 ± 38.47 <sup>b</sup> | 20.78 ± 27.10 <sup>b</sup> | 0.00 ± 0.00 | 0.00 ± 0.00  |
|            | 0                         | 92.15 ± 15.45 <sup>a</sup> | 63.41 ± 13.05 <sup>a</sup> | 76.21 ± 15.88 <sup>a</sup> | 68.53 ± 3.17 <sup>a</sup>  | 83.23 ± 0.72               | 82.35 ± 4.38               | 2.00 ± 0.22 | 13.75 ± 0.62 |
|            | 10                        | 93.02 ± 19.14 <sup>a</sup> | 62.36 ± 17.30 <sup>a</sup> | 75.08 ± 20.57 <sup>a</sup> | 66.55 ± 6.95 <sup>a</sup>  | 83.00 ± 0.83               | 80.14 ± 7.69               | 1.87 ± 0.19 | 14.76 ± 1.29 |
| 75         | 50                        | 93.30 ± 36.77 <sup>a</sup> | 63.65 ± 34.71 <sup>a</sup> | 75.54 ± 39.38 <sup>a</sup> | 65.82 ± 9.46 <sup>a</sup>  | 83.66 ± 2.11               | 78.58 ± 9.87               | 1.81 ± 0.11 | 14.96 ± 0.72 |
|            | 100                       | 81.72 ± 20.22 <sup>a</sup> | 54.97 ± 19.92 <sup>a</sup> | 64.77 ± 22.27 <sup>a</sup> | 66.20 ± 10.83 <sup>a</sup> | 84.46 ± 2.29               | 78.19 ± 10.87              | 1.84 ± 0.14 | 14.77 ± 1.36 |
|            | 500                       | 0.00 ± 0.00 <sup>b</sup>   | 0.00 ± 0.00                | 0.00 ± 0.00                | 0.00 ± 0.00 | 0.00 ± 0.00  |

CdCl<sub>2</sub>-cadmium chloride, VCL-curvilinear velocity, VSL-straight-line velocity, VAP-average-path velocity, LIN-linearity, STR-straightness, WOB-wobble, ALH-amplitude of lateral head displacement and BCF-beat-cross frequency, a-d = values in columns with different superscript letters were significantly different among the concentrations of CdCl<sub>2</sub> (P<0.05).

**Table S11: Rhesus sperm motility parameters over 120 minutes of exposure to CuSO<sub>4</sub> (0-250 µg/ml) (n=3)**

| Time (min) | CuSO <sub>4</sub> (µg/ml) | Total Motility (%) | Progressive Motility (%)   | Rapid Spermatozoa (%) | Medium Spermatozoa (%)     | Slow Spermatozoa (%) |
|------------|---------------------------|--------------------|----------------------------|-----------------------|----------------------------|----------------------|
| 15         | 0                         | 64.72 ± 26.00      | 51.14 ± 24.64              | 44.68 ± 25.92         | 9.87 ± 6.84                | 10.18 ± 1.45         |
|            | 10                        | 69.16 ± 23.94      | 58.15 ± 25.00              | 53.18 ± 27.74         | 8.33 ± 8.90                | 7.65 ± 5.09          |
|            | 50                        | 66.69 ± 23.93      | 54.20 ± 20.72              | 47.64 ± 23.30         | 9.18 ± 8.00                | 9.87 ± 2.13          |
|            | 100                       | 73.85 ± 22.12      | 59.09 ± 20.72              | 52.07 ± 24.64         | 10.63 ± 7.78               | 11.14 ± 4.59         |
|            | 250                       | 52.15 ± 43.93      | 41.26 ± 38.46              | 35.75 ± 37.57         | 8.25 ± 8.13                | 8.15 ± 4.67          |
| 60         | 0                         | 57.35 ± 24.58      | 33.01 ± 13.71              | 25.95 ± 11.37         | 12.02 ± 9.17               | 19.37 ± 10.99        |
|            | 10                        | 58.51 ± 23.63      | 34.65 ± 10.45              | 24.77 ± 9.47          | 13.86 ± 8.05               | 19.87 ± 12.22        |
|            | 50                        | 55.66 ± 26.45      | 30.44 ± 15.12              | 20.11 ± 11.51         | 14.30 ± 10.40              | 21.25 ± 12.88        |
|            | 100                       | 49.07 ± 36.85      | 23.14 ± 22.96              | 13.87 ± 15.68         | 12.65 ± 9.78               | 22.54 ± 13.41        |
|            | 250                       | 4.55 ± 5.06        | 1.01 ± 1.75                | 0.51 ± 0.87           | 0.71 ± 1.22                | 3.34 ± 3.19          |
| 120        | 0                         | 35.03 ± 37.50      | 11.58 ± 12.48 <sup>a</sup> | 4.70 ± 5.17           | 11.02 ± 13.70 <sup>a</sup> | 19.32 ± 19.13        |
|            | 10                        | 34.11 ± 29.58      | 9.55 ± 6.12 <sup>a</sup>   | 3.12 ± 1.66           | 9.24 ± 9.32 <sup>a</sup>   | 21.75 ± 20.33        |
|            | 50                        | 36.43 ± 34.80      | 10.62 ± 10.54 <sup>a</sup> | 3.95 ± 3.69           | 11.86 ± 14.30 <sup>a</sup> | 20.62 ± 17.69        |
|            | 100                       | 27.74 ± 30.96      | 4.05 ± 4.19 <sup>b</sup>   | 1.06 ± 1.28           | 5.01 ± 4.09 <sup>b</sup>   | 21.67 ± 26.07        |
|            | 250                       | 0.18 ± 0.32        | 0.18 ± 0.32 <sup>c</sup>   | 0.18 ± 0.32           | 0.00 ± 0.00 <sup>c</sup>   | 0.00 ± 0.00          |

CuSO<sub>4</sub>-copper sulphate, a-c = values in columns with different superscript letters were significantly different among the concentrations of CuSO<sub>4</sub> (P < 0.05).

**Table S12: Rhesus sperm kinematic parameters over 120 minutes of exposure to CuSO<sub>4</sub> (0-250 µg/ml) (n=3)**

| Time (min) | CuSO <sub>4</sub> (µg/ml) | VCL (µm/s)     | VSL (µm/s)     | VAP (µm/s)     | LIN (%)       | STR (%)                   | WOB (%)                    | ALH (µm)                 | BCF (Hz)                  |
|------------|---------------------------|----------------|----------------|----------------|---------------|---------------------------|----------------------------|--------------------------|---------------------------|
| 15         | 0                         | 176.69 ± 40.47 | 139.14 ± 41.15 | 154.49 ± 42.51 | 77.79 ± 6.29  | 89.63 ± 2.76              | 86.71 ± 4.91               | 2.57 ± 0.21              | 16.90 ± 1.18 <sup>a</sup> |
|            | 10                        | 204.26 ± 59.85 | 167.38 ± 60.76 | 182.39 ± 59.82 | 80.56 ± 8.05  | 90.83 ± 4.29              | 88.56 ± 5.13               | 2.53 ± 0.42              | 17.19 ± 0.41 <sup>a</sup> |
|            | 50                        | 189.00 ± 40.35 | 155.56 ± 43.00 | 171.77 ± 44.96 | 81.49 ± 6.29  | 90.34 ± 2.94              | 90.15 ± 5.16               | 2.16 ± 0.04              | 16.14 ± 1.33 <sup>a</sup> |
|            | 100                       | 168.23 ± 41.03 | 126.06 ± 35.80 | 141.86 ± 40.63 | 74.39 ± 4.37  | 88.87 ± 1.30              | 83.69 ± 4.37               | 2.59 ± 0.31              | 17.92 ± 0.47 <sup>a</sup> |
|            | 250                       | 149.88 ± 47.20 | 119.65 ± 38.51 | 134.07 ± 45.17 | 80.06 ± 10.76 | 89.49 ± 4.77              | 89.24 ± 7.68               | 2.12 ± 0.31              | 15.47 ± 2.92 <sup>b</sup> |
|            | 0                         | 133.74 ± 50.35 | 99.09 ± 63.22  | 110.62 ± 61.66 | 70.07 ± 18.6  | 87.20 ± 6.73 <sup>a</sup> | 79.82 ± 15.93 <sup>a</sup> | 2.07 ± 0.68 <sup>a</sup> | 18.48 ± 2.85 <sup>a</sup> |
|            | 10                        | 129.99 ± 44.89 | 99.79 ± 54.07  | 108.87 ± 51.81 | 73.76 ± 14.22 | 89.94 ± 5.44 <sup>a</sup> | 81.59 ± 10.81 <sup>a</sup> | 2.17 ± 0.38 <sup>a</sup> | 17.45 ± 1.60 <sup>a</sup> |



|     |     |                |                            |                            |                            |                            |                            |                          |                           |
|-----|-----|----------------|----------------------------|----------------------------|----------------------------|----------------------------|----------------------------|--------------------------|---------------------------|
| 60  | 50  | 122.76 ± 43.02 | 92.45 ± 54.69              | 101.43 ± 51.71             | 71.50 ± 16.72              | 88.79 ± 7.02 <sup>a</sup>  | 79.93 ± 12.29 <sup>a</sup> | 2.27 ± 0.43 <sup>a</sup> | 17.50 ± 1.99 <sup>a</sup> |
|     | 100 | 93.63 ± 12.68  | 68.21 ± 17.47              | 78.95 ± 13.69              | 72.13 ± 11.53              | 85.48 ± 8.49 <sup>a</sup>  | 84.05 ± 5.43 <sup>a</sup>  | 2.01 ± 0.27 <sup>a</sup> | 16.20 ± 0.42 <sup>a</sup> |
|     | 250 | 38.58 ± 44.15  | 19.80 ± 32.52              | 25.75 ± 38.80              | 24.42 ± 36.28              | 37.20 ± 41.19 <sup>b</sup> | 34.95 ± 41.72 <sup>b</sup> | 0.72 ± 1.25 <sup>b</sup> | 4.68 ± 8.11 <sup>b</sup>  |
|     | 0   | 85.03 ± 13.14  | 48.17 ± 22.66 <sup>a</sup> | 56.36 ± 22.25 <sup>a</sup> | 55.05 ± 17.13 <sup>a</sup> | 83.97 ± 5.76 <sup>a</sup>  | 64.87 ± 15.50 <sup>a</sup> | 1.98 ± 0.45 <sup>a</sup> | 16.73 ± 5.70 <sup>a</sup> |
| 120 | 10  | 90.65 ± 31.00  | 55.72 ± 36.12 <sup>a</sup> | 63.52 ± 35.12 <sup>a</sup> | 57.66 ± 17.38 <sup>a</sup> | 84.96 ± 7.63 <sup>a</sup>  | 67.11 ± 14.42 <sup>a</sup> | 2.15 ± 0.23 <sup>a</sup> | 16.65 ± 3.12 <sup>a</sup> |
|     | 50  | 85.51 ± 18.33  | 52.94 ± 35.03 <sup>a</sup> | 60.11 ± 35.52 <sup>b</sup> | 58.36 ± 25.70 <sup>a</sup> | 84.62 ± 9.72 <sup>a</sup>  | 67.40 ± 21.46 <sup>a</sup> | 2.26 ± 0.19 <sup>a</sup> | 17.51 ± 3.66 <sup>a</sup> |
|     | 100 | 56.87 ± 15.69  | 25.38 ± 4.99 <sup>b</sup>  | 37.79 ± 2.32 <sup>c</sup>  | 45.40 ± 4.56 <sup>a</sup>  | 67.16 ± 12.86 <sup>b</sup> | 70.01 ± 20.09 <sup>a</sup> | 1.29 ± 1.18 <sup>a</sup> | 11.29 ± 9.93 <sup>a</sup> |
|     | 250 | 14.13 ± 24.47  | 2.00 ± 3.47 <sup>b</sup>   | 3.93 ± 6.80 <sup>d</sup>   | 4.73 ± 8.19 <sup>b</sup>   | 17.02 ± 29.47 <sup>b</sup> | 9.26 ± 16.04 <sup>b</sup>  | 0.00 ± 0.00 <sup>b</sup> | 0.00 ± 0.00 <sup>b</sup>  |

CuSO<sub>4</sub>-copper sulphate, VCL-curvilinear velocity, VSL- straight-line velocity, VAP-average-path velocity, LIN-linearity, STR-straightness, WOB-wobble, ALH-amplitude of lateral head displacement and BCF-beat-cross frequency, a-d = values in columns with different superscript letters were significantly different among the concentrations of CuSO<sub>4</sub> (P < 0.05).

**Table S13: Rhesus sperm motility parameters over 120 minutes of exposure to CdCl<sub>2</sub> (0-500 µg/ml) (n=3)**

| Time (min) | CdCl <sub>2</sub> (µg/ml) | Total Motility (%)         | Progressive Motility (%)   | Rapid Spermatozoa (%)      | Medium Spermatozoa (%)     | Slow Spermatozoa (%)       |
|------------|---------------------------|----------------------------|----------------------------|----------------------------|----------------------------|----------------------------|
| 15         | 0                         | 62.33 ± 26.27              | 47.88 ± 23.30              | 42.48 ± 24.70              | 9.02 ± 2.47 <sup>a</sup>   | 10.83 ± 3.06               |
|            | 10                        | 59.29 ± 31.35              | 46.01 ± 30.48              | 39.68 ± 30.76              | 10.83 ± 1.13 <sup>a</sup>  | 8.78 ± 3.58                |
|            | 50                        | 63.90 ± 32.66              | 50.43 ± 33.31              | 45.17 ± 34.89              | 8.41 ± 2.23 <sup>a</sup>   | 10.31 ± 2.78               |
|            | 100                       | 63.63 ± 30.00              | 45.36 ± 29.67              | 40.38 ± 30.70              | 8.61 ± 1.21 <sup>a</sup>   | 14.64 ± 4.23               |
|            | 500                       | 43.83 ± 38.44              | 24.61 ± 31.16              | 18.66 ± 27.81              | 8.07 ± 5.91 <sup>b</sup>   | 17.10 ± 7.18               |
| 60         | 0                         | 43.25 ± 45.46              | 27.48 ± 30.27              | 22.76 ± 25.42              | 7.20 ± 7.12                | 13.29 ± 13.11              |
|            | 10                        | 55.00 ± 26.83              | 31.96 ± 25.17              | 23.33 ± 20.88              | 13.83 ± 5.85               | 17.84 ± 2.00               |
|            | 50                        | 46.14 ± 37.55              | 30.95 ± 34.56              | 25.00 ± 31.61              | 9.01 ± 3.76                | 12.14 ± 2.63               |
|            | 100                       | 49.25 ± 36.79              | 30.46 ± 30.63              | 23.21 ± 29.03              | 12.38 ± 4.67               | 13.66 ± 3.58               |
|            | 500                       | 1.83 ± 1.58                | 0.09 ± 0.16                | 0.09 ± 0.16                | 0.09 ± 0.16                | 1.65 ± 1.45                |
| 120        | 0                         | 49.06 ± 45.88 <sup>a</sup> | 27.93 ± 35.51 <sup>a</sup> | 19.18 ± 25.53 <sup>a</sup> | 12.11 ± 10.75 <sup>a</sup> | 17.78 ± 9.61 <sup>a</sup>  |
|            | 10                        | 45.16 ± 47.53 <sup>a</sup> | 29.33 ± 39.49 <sup>a</sup> | 24.21 ± 33.05 <sup>a</sup> | 8.11 ± 8.68 <sup>a</sup>   | 12.83 ± 5.80 <sup>a</sup>  |
|            | 50                        | 45.61 ± 54.72 <sup>a</sup> | 28.58 ± 40.08 <sup>a</sup> | 21.94 ± 31.03 <sup>a</sup> | 8.88 ± 11.89 <sup>a</sup>  | 14.79 ± 11.80 <sup>a</sup> |
|            | 100                       | 41.74 ± 56.56 <sup>a</sup> | 18.59 ± 25.67 <sup>a</sup> | 12.28 ± 17.06 <sup>a</sup> | 10.76 ± 14.60 <sup>a</sup> | 18.70 ± 24.90 <sup>a</sup> |
|            | 500                       | 0.81 ± 1.15 <sup>b</sup>   | 0.00 ± 0.00 <sup>b</sup>   | 0.00 ± 0.00 <sup>b</sup>   | 0.00 ± 0.00 <sup>b</sup>   | 0.81 ± 1.15 <sup>b</sup>   |

CdCl<sub>2</sub>-cadmium chloride, a, b = values in columns with different superscript letters were significantly different among the concentrations of CdCl<sub>2</sub> (P<0.05).

**Table S14: Rhesus sperm kinematic parameters over 120 minutes of exposure to CdCl<sub>2</sub> (0-500 µg/ml) (n=3)**

| Time (min) | CdCl <sub>2</sub> (µg/ml) | VCL (µm/s)                  | VSL (µm/s)                 | VAP (µm/s)                 | LIN (%)                    | STR (%)                    | WOB (%)                    | ALH (µm)                 | BCF (Hz)                   |
|------------|---------------------------|-----------------------------|----------------------------|----------------------------|----------------------------|----------------------------|----------------------------|--------------------------|----------------------------|
| 15         | 0                         | 166.46 ± 35.79              | 117.58 ± 14.08             | 137.76 ± 27.69             | 71.58 ± 6.70 <sup>a</sup>  | 86.24 ± 6.65               | 82.94 ± 1.66 <sup>a</sup>  | 2.53 ± 0.24              | 16.28 ± 1.04               |
|            | 10                        | 163.08 ± 59.12              | 115.21 ± 43.59             | 134.87 ± 54.96             | 70.32 ± 1.58 <sup>a</sup>  | 86.06 ± 2.67               | 81.78 ± 3.83 <sup>a</sup>  | 2.60 ± 0.29              | 16.03 ± 1.04               |
|            | 50                        | 172.98 ± 67.00              | 126.64 ± 48.34             | 146.25 ± 61.87             | 73.16 ± 4.07 <sup>a</sup>  | 87.63 ± 4.97               | 83.56 ± 4.06 <sup>a</sup>  | 2.56 ± 0.31              | 16.13 ± 1.10               |
|            | 100                       | 152.31 ± 55.11              | 109.12 ± 40.50             | 125.84 ± 49.90             | 71.40 ± 1.28 <sup>a</sup>  | 87.34 ± 3.29               | 81.83 ± 3.58 <sup>a</sup>  | 2.60 ± 0.33              | 16.31 ± 1.69               |
|            | 500                       | 103.61 ± 47.94              | 69.91 ± 37.56              | 82.27 ± 45.12              | 65.35 ± 11.37 <sup>b</sup> | 84.83 ± 5.00               | 76.80 ± 10.39 <sup>b</sup> | 2.16 ± 0.23              | 15.92 ± 0.48               |
| 60         | 0                         | 89.95 ± 78.89               | 64.99 ± 56.96 <sup>a</sup> | 75.56 ± 66.95              | 48.18 ± 41.73 <sup>a</sup> | 57.59 ± 49.97 <sup>a</sup> | 55.83 ± 48.43 <sup>a</sup> | 1.44 ± 1.24 <sup>a</sup> | 11.44 ± 9.97 <sup>a</sup>  |
|            | 10                        | 117.88 ± 21.12              | 78.35 ± 20.54 <sup>a</sup> | 92.05 ± 23.19              | 65.83 ± 5.55 <sup>a</sup>  | 84.96 ± 2.82 <sup>b</sup>  | 77.45 ± 5.35 <sup>a</sup>  | 2.41 ± 0.19 <sup>a</sup> | 15.77 ± 0.95 <sup>a</sup>  |
|            | 50                        | 118.89 ± 45.37              | 76.95 ± 43.22 <sup>a</sup> | 91.46 ± 48.02              | 61.94 ± 10.92 <sup>a</sup> | 83.22 ± 3.08 <sup>b</sup>  | 74.23 ± 10.68 <sup>a</sup> | 2.28 ± 0.12 <sup>a</sup> | 17.15 ± 1.74 <sup>a</sup>  |
|            | 100                       | 117.26 ± 43.57              | 76.77 ± 46.76 <sup>a</sup> | 91.49 ± 51.65              | 62.07 ± 15.52 <sup>a</sup> | 82.62 ± 3.47 <sup>b</sup>  | 74.76 ± 16.01 <sup>a</sup> | 2.18 ± 0.16 <sup>a</sup> | 17.45 ± 3.90 <sup>a</sup>  |
|            | 500                       | 34.87 ± 30.30               | 4.21 ± 3.76 <sup>b</sup>   | 12.42 ± 10.81              | 8.11 ± 7.40 <sup>b</sup>   | 22.46 ± 19.68 <sup>c</sup> | 23.86 ± 21.00 <sup>b</sup> | 0.00 ± 0.00 <sup>b</sup> | 0.00 ± 0.00 <sup>b</sup>   |
| 120        | 0                         | 99.00 ± 30.60 <sup>a</sup>  | 56.63 ± 39.58              | 67.89 ± 40.71 <sup>a</sup> | 53.39 ± 23.42 <sup>a</sup> | 80.38 ± 10.10 <sup>a</sup> | 65.35 ± 20.92 <sup>a</sup> | 1.91 ± 0.27 <sup>a</sup> | 15.26 ± 4.14 <sup>a</sup>  |
|            | 10                        | 112.19 ± 51.93 <sup>a</sup> | 71.01 ± 58.30              | 84.78 ± 57.80 <sup>a</sup> | 57.42 ± 25.39 <sup>a</sup> | 78.57 ± 15.20 <sup>a</sup> | 71.28 ± 18.52 <sup>a</sup> | 1.85 ± 0.49 <sup>a</sup> | 11.55 ± 7.86 <sup>a</sup>  |
|            | 50                        | 98.27 ± 50.82 <sup>a</sup>  | 65.72 ± 54.49              | 75.65 ± 56.21 <sup>a</sup> | 60.65 ± 24.08 <sup>a</sup> | 83.05 ± 10.32 <sup>a</sup> | 71.79 ± 20.07 <sup>a</sup> | 1.17 ± 1.19 <sup>a</sup> | 10.27 ± 10.64 <sup>a</sup> |
|            | 100                       | 95.50 ± 8.43 <sup>a</sup>   | 42.17 ± 32.53              | 59.43 ± 23.24 <sup>a</sup> | 42.82 ± 30.28 <sup>a</sup> | 65.24 ± 29.22 <sup>a</sup> | 61.40 ± 18.92 <sup>a</sup> | 1.36 ± 1.13 <sup>a</sup> | 10.84 ± 12.15 <sup>a</sup> |
|            | 500                       | 23.93 ± 33.84 <sup>b</sup>  | 2.15 ± 3.04                | 8.03 ± 11.35 <sup>b</sup>  | 4.48 ± 6.34 <sup>b</sup>   | 13.37 ± 18.90 <sup>b</sup> | 16.77 ± 23.72 <sup>b</sup> | 0.00 ± 0.00 <sup>b</sup> | 0.00 ± 0.00 <sup>b</sup>   |

CdCl<sub>2</sub>-cadmium chloride, VCL-curvilinear velocity, VSL-straight-line velocity, VAP-average-path velocity, LIN-linearity, STR-straightness, WOB-wobble, ALH-amplitude of lateral head displacement and BCF-beat-cross frequency, a-c = values in columns with different superscript letters were significantly different among the concentrations of CdCl<sub>2</sub> (P<0.05).

**Table S15: Effect of CuSO<sub>4</sub> and CdCl<sub>2</sub> on sperm vitality percentages (mean ± SD) of vervet monkey (n = 3-4) after 60–180 min incubation.**

| Time (min) | CuSO <sub>4</sub> (µg/ml) n=4 | Absorbance     | CdCl <sub>2</sub> (µg/ml) n=3 | Absorbance    |
|------------|-------------------------------|----------------|-------------------------------|---------------|
| 120        | 0                             | 0.131 ± 0.033  | 0                             | 0.098 ± 0.020 |
|            | 10                            | 0.087 ± 0.042  | 10                            | 0.086 ± 0.007 |
|            | 50                            | -0.024 ± 0.022 | 50                            | 0.050 ± 0.057 |
|            | 100                           | -0.019 ± 0.023 | 100                           | 0.043 ± 0.061 |

|     |     |                     |     |                     |
|-----|-----|---------------------|-----|---------------------|
|     | 250 | $0.007 \pm 0.010$   | 500 | $0.071 \pm 0.013$   |
|     | 0   | $0.205 \pm 0.034^a$ | 0   | $0.151 \pm 0.021^a$ |
|     | 10  | $0.150 \pm 0.062^b$ | 10  | $0.132 \pm 0.018^b$ |
| 180 | 50  | $0.006 \pm 0.010^b$ | 50  | $0.081 \pm 0.062^c$ |
|     | 100 | $0.004 \pm 0.009^b$ | 100 | $0.072 \pm 0.062^c$ |
|     | 250 | $0.008 \pm 0.010^b$ | 500 | $0.086 \pm 0.014^d$ |

---

a, b, c, d = values in columns with different superscript letters were significantly different among the concentrations of CuSO<sub>4</sub> and CdCl<sub>2</sub> (P < 0.05).
